# Supplementary material for: Producing green hydrogen in an efficient way using a nexus of a waste-biomass derived catalyst and a cost-effective & scalable electrode platform
Source: Royal Society of Chemistry journal article supplement (doi:10.1039/d3nj01249b), 2023-01-01
Supplement: d3nj01249b1.pdf [file d3nj01249b1.pdf]

## Electronic Supplementary Information

# Producing green hydrogen in an efficient way using a nexus of waste-biomass derived catalyst and cost- effective & scalable electrode platform

*Kirti<sup>a,c</sup>†, Amravati S. Singh<sup>b,c</sup>†, Kinjal B. Patel<sup>a,c</sup>, Ashish A. Patil<sup>a</sup>, Ankush V. Biradar<sup>b,c</sup>\**

*Divesh N. Srivastava<sup>a,c</sup> \**

*<sup>a</sup>Analytical and Environmental Science Division and Centralized Instrument Facility*

*<sup>b</sup>Inorganic Materials and Catalysis Division, CSIR-Central Salt and Marine Chemicals  
Research Institute (CSIR-CSMCRI), G. B. Marg, Bhavnagar-364002, Gujarat, India*

*<sup>c</sup>Academy of Scientific and Innovative Research (AcSIR), Ghaziabad 201002, , India*

*† Both these authors contributed equally*

*\*Corresponding author Tel: +91-278-2567760; EXT 6730*

*E-mail: [dnsrivastava@csmcri.res.in](mailto:dnsrivastava@csmcri.res.in), [ankush@csmcri.res.in](mailto:ankush@csmcri.res.in)*

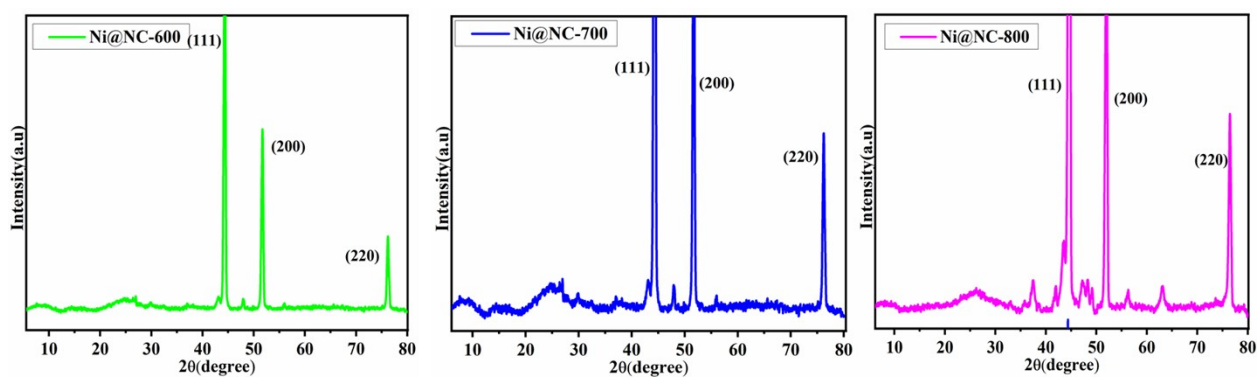

**Figure S1.** Zoom PXRD spectra of synthesized electrocatalyst.

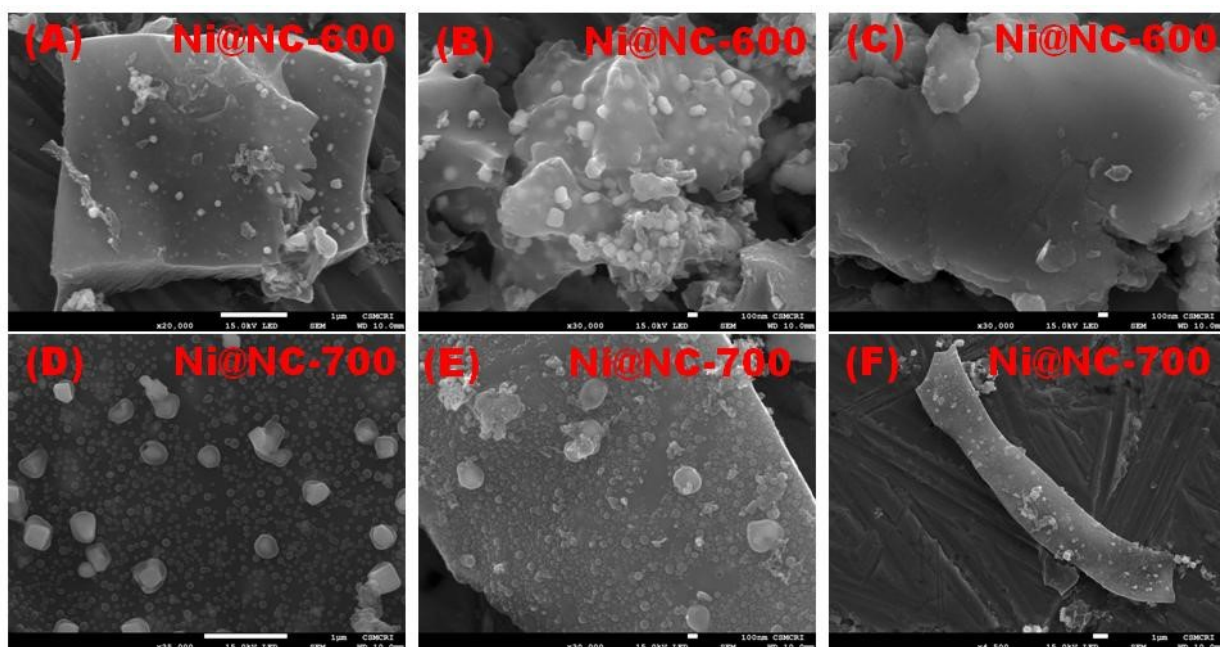

**Figure S2.** Scanning electron microscopy (SEM) image of Ni@NC-600 (A-C), Ni@NC-700 (D-F)

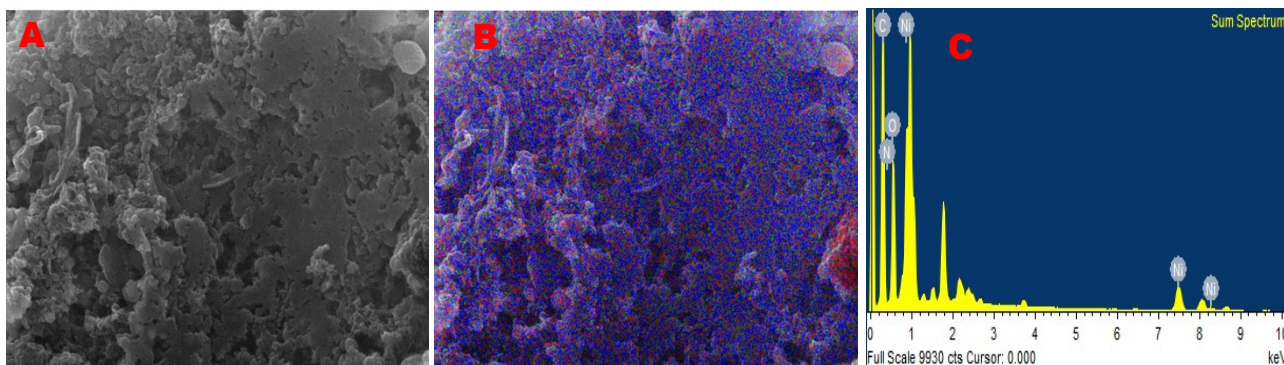

**Figure S3.** Scanning electron microscopy (SEM) image (A), Surface elemental mapping (B), EDX spectra of Ni@NC-800(C).

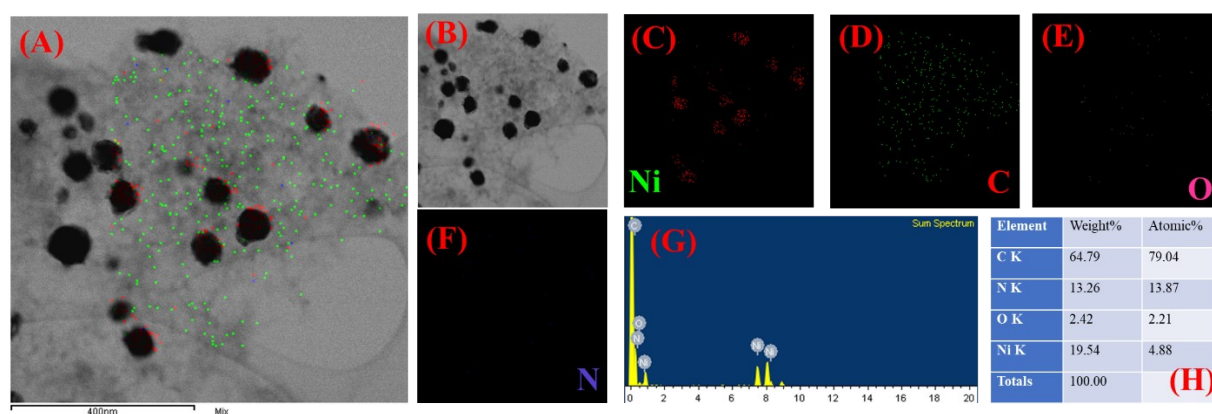

**Figure S4.** (A) Elemental mapping of the mixture of Ni, C, N and O, (B) electron images (C) Oxygen (D) Carbon, (E) Oxygen, (F) Nitrogen. (G) EDAX spectra of Ni@NC-800 (H) Table of elemental content Ni@NC-800.

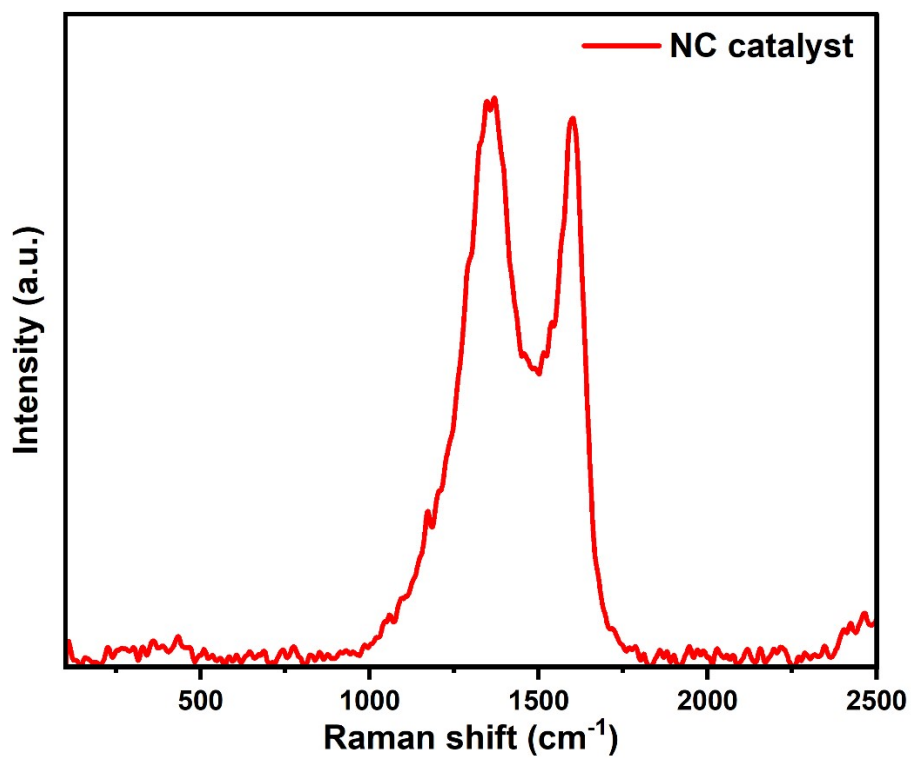

**Figure S5:** Raman spectra of NC catalyst.

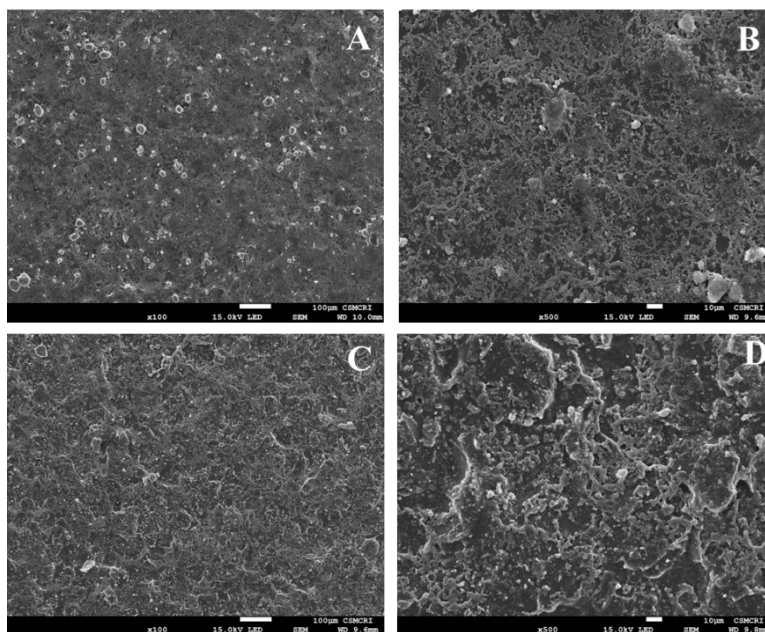

**Figure S6:** SEM analysis of Ni@NC-800 modified PCE (A,B) before, and (C,D) after the HER experiments.

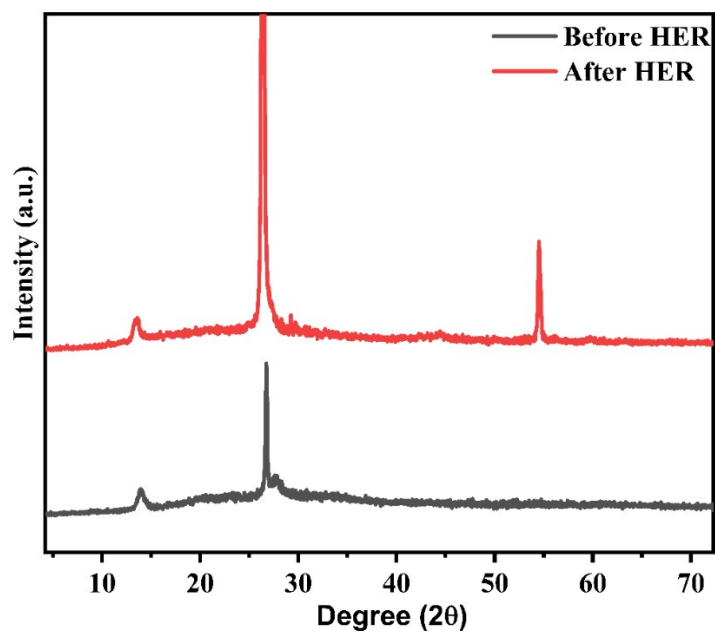

**Figure S7:** XRD spectra of Ni@NC-800 modified PCE before, and after the HER experiments.

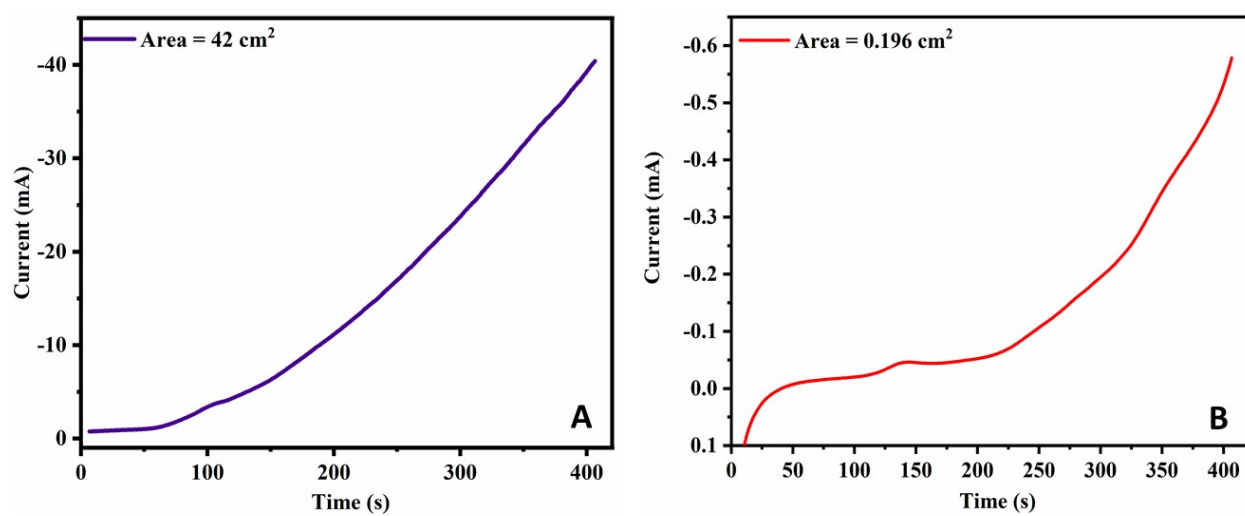

**Figure S8.** Time vs. current plot obtained from LSV (A) Ni@NC-800 modified PCE (area = 42 cm<sup>2</sup>); (B) Ni@NC-800 modified PCE (area = 0.196 cm<sup>2</sup>).

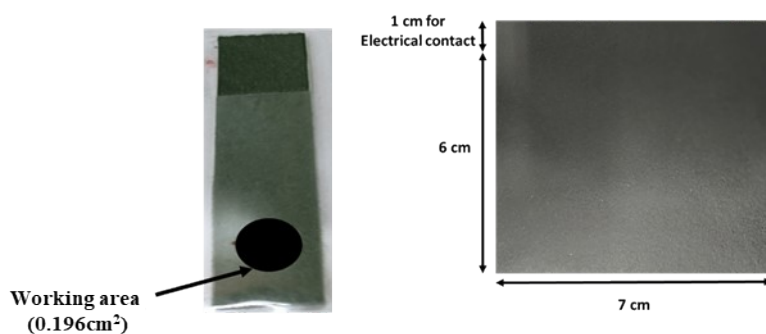

**Figure S9.** Photograph of Laminated Plastic Chip Electrode (area = 0.196 cm<sup>2</sup>) for small scale experiment and Plastic chip electrode (area = 42 cm<sup>2</sup>) for large scale experiment.

**Table S1. Comparison of electrochemical performance with another reported electrocatalyst**

| Electrocatalyst                         | Electrolyte                          | Electrode               | Overpotential(mV vs RHE) at 10mAcm <sup>-2</sup> | Reference |
|-----------------------------------------|--------------------------------------|-------------------------|--------------------------------------------------|-----------|
| Ni@NC-800                               | 0.5 M H <sub>2</sub> SO <sub>4</sub> | PCE                     | 400                                              | This work |
| Few-layered MoS <sub>2</sub> nanosheets | 0.5 M H <sub>2</sub> SO <sub>4</sub> | Glassy Carbon Electrode | 540                                              | 1         |
| ON-CNF                                  | 0.5 M H <sub>2</sub> SO <sub>4</sub> | Glassy Carbon Electrode | 490                                              | 2         |
| Ni <sub>3</sub> S <sub>2</sub> /MWCNT   | 1 M KOH                              | Glassy Carbon Electrode | 480                                              | 3         |
| Ni <sub>3</sub> S <sub>2</sub>          | 0.5 M H <sub>2</sub> SO <sub>4</sub> | Glassy Carbon Electrode | 832                                              | 4         |
| Ni <sub>3</sub> S <sub>2</sub> -Ni      | 0.5 M H <sub>2</sub> SO <sub>4</sub> | Glassy Carbon Electrode | 320                                              | 4         |
| Ni@NC                                   | 0.5 M H <sub>2</sub> SO <sub>4</sub> | Glassy Carbon Electrode | 370                                              | 5         |
| Ni(OH) <sub>2</sub> /TM                 | 1 M KOH                              | Ti Mesh                 | 537                                              | 6         |

## References

1. B Lai, SC Singh, JK Bindra, CS Saraj, A Shukla, TP Yadav, W Wu, SA McGill, NS Dalal, A Srivastava, C Guo, *Materials Today Chemistry*, 2019, **14**,100207.
2. D F Niu, Y Ding, Z X Ma, M H Wang, Z Liu, B W Zhang, X S Zhang, *Acta Chim. Sinica*, 2015, **73(7)**, 729–734.
3. TW Lin, CJ Liu, CS Dai, *Applied Catalysis B: Environmental*, 2014, **154**, 213-220.
4. B Busupalli, S Battu, SK Haram, BL Prasad, *Chemistry Select*, 2016, **21**, 6708-6712.
5. SA Shah, X Shen, M Xie, G Zhu, Z Ji, H Zhou, K Xu, X Yue, A Yuan, J Zhu, Y Chen, *Small*, 2019,**15(9)**, 1804545.
6. Y Wang, J Wang, T Xie, Q Zhu, D Zeng, R Li, X Zhang, S Liu, *Applied Surface Science*, 2019, **485**, 506-12.
